# Supplementary material for: Associations between participation in, intensity of, and time spent on leisure time physical activity and risk of inflammatory bowel disease among older adults (PA-IBD): a prospective cohort study
Source: PubMed Central journal article supplement (PMC8015056; doi:10.1186/s12889-021-10492-7), 2021-04-01
Supplement: 12889_2021_10492_MOESM1_ESM.pdf [file 12889_2021_10492_MOESM1_ESM.pdf]

Supplemental table S1. Hazard ratios from adjusted analyses stratified on age, smoking, BMI, physical activity at work, and work status

|                     | MET hours   |      |      | Walking     |      |      | Housework   |      |      | Gardening   |      |      | Do-it-yourself |      |      | Cycling     |      |      | Sport       |      |      |
|---------------------|-------------|------|------|-------------|------|------|-------------|------|------|-------------|------|------|----------------|------|------|-------------|------|------|-------------|------|------|
| <u>2nd quartile</u> |             |      |      |             |      |      |             |      |      |             |      |      |                |      |      |             |      |      |             |      |      |
| 50-59 years         | <b>0.99</b> | 0.70 | 1.41 | <b>0.72</b> | 0.50 | 1.03 | <b>0.94</b> | 0.64 | 1.37 | <b>1.07</b> | 0.77 | 1.48 | <b>0.93</b>    | 0.64 | 1.34 | <b>1.16</b> | 0.80 | 1.68 | <b>1.13</b> | 0.60 | 2.12 |
| 60-64 years         | <b>0.71</b> | 0.44 | 1.15 | <b>0.94</b> | 0.37 | 1.16 | <b>1.13</b> | 0.68 | 1.90 | <b>0.44</b> | 0.24 | 0.81 | <b>1.56</b>    | 0.93 | 2.61 | <b>0.92</b> | 0.57 | 1.46 | <b>1.00</b> | 0.48 | 2.10 |
| Non smoker          | <b>1.24</b> | 0.70 | 2.21 | <b>1.15</b> | 0.65 | 2.04 | <b>0.99</b> | 0.51 | 1.91 | <b>1.10</b> | 0.63 | 1.90 | <b>1.32</b>    | 0.74 | 2.36 | <b>0.71</b> | 0.39 | 1.28 | <b>1.30</b> | 0.51 | 3.34 |
| Smoker              | <b>0.79</b> | 0.57 | 1.10 | <b>0.71</b> | 0.51 | 0.99 | <b>1.01</b> | 0.72 | 1.43 | <b>0.80</b> | 0.58 | 1.12 | <b>1.06</b>    | 0.74 | 1.51 | <b>1.21</b> | 0.86 | 1.70 | <b>1.02</b> | 0.58 | 1.78 |
| BMI <25.0           | <b>1.10</b> | 0.71 | 1.72 | <b>0.66</b> | 0.42 | 1.05 | <b>1.15</b> | 0.72 | 1.83 | <b>1.17</b> | 0.76 | 1.81 | <b>1.14</b>    | 0.72 | 1.78 | <b>0.79</b> | 0.50 | 1.24 | <b>0.57</b> | 0.31 | 1.03 |
| BMI >25.0           | <b>0.77</b> | 0.53 | 1.12 | <b>0.90</b> | 0.63 | 1.30 | <b>0.90</b> | 0.60 | 1.36 | <b>0.66</b> | 0.45 | 0.97 | <b>1.10</b>    | 0.73 | 1.65 | <b>1.30</b> | 0.88 | 1.92 | <b>2.38</b> | 0.97 | 5.86 |
| Sedentary           | <b>0.79</b> | 0.55 | 1.12 | <b>0.89</b> | 0.62 | 1.28 | <b>1.19</b> | 0.82 | 1.75 | <b>0.83</b> | 0.58 | 1.19 | <b>1.02</b>    | 0.71 | 1.46 | <b>1.18</b> | 0.83 | 1.67 | <b>1.06</b> | 0.58 | 1.94 |
| Active at work      | <b>1.11</b> | 0.69 | 1.80 | <b>0.69</b> | 0.43 | 1.10 | <b>0.73</b> | 0.43 | 1.23 | <b>0.94</b> | 0.59 | 1.49 | <b>1.42</b>    | 0.84 | 2.39 | <b>0.82</b> | 0.48 | 1.39 | <b>1.09</b> | 0.49 | 2.39 |
| Not working         | <b>0.85</b> | 0.44 | 1.63 | <b>0.85</b> | 0.43 | 1.67 | <b>1.77</b> | 0.87 | 3.62 | <b>0.52</b> | 0.29 | 0.93 | <b>1.16</b>    | 0.64 | 2.10 | <b>0.87</b> | 0.47 | 1.60 | <b>0.72</b> | 0.28 | 1.87 |
| Working             | <b>0.89</b> | 0.65 | 1.22 | <b>0.79</b> | 0.58 | 1.08 | <b>0.85</b> | 0.60 | 1.20 | <b>1.02</b> | 0.74 | 1.41 | <b>1.10</b>    | 0.78 | 1.56 | <b>1.13</b> | 0.81 | 1.58 | <b>1.18</b> | 0.68 | 2.07 |
| <u>3rd quartile</u> |             |      |      |             |      |      |             |      |      |             |      |      |                |      |      |             |      |      |             |      |      |
| 50-59 years         | <b>0.68</b> | 0.46 | 1.02 | <b>0.78</b> | 0.52 | 1.18 | <b>0.77</b> | 0.49 | 1.21 | <b>0.76</b> | 0.52 | 1.12 | <b>1.10</b>    | 0.72 | 1.68 | <b>1.06</b> | 0.71 | 1.59 | <b>1.14</b> | 0.60 | 2.16 |
| 60-64 years         | <b>0.74</b> | 0.47 | 1.18 | <b>0.66</b> | 0.37 | 1.16 | <b>1.14</b> | 0.87 | 2.60 | <b>0.44</b> | 0.23 | 0.84 | <b>1.92</b>    | 1.11 | 3.31 | <b>1.00</b> | 0.61 | 1.65 | <b>0.87</b> | 0.40 | 1.88 |
| Non smoker          | <b>1.13</b> | 0.63 | 2.04 | <b>1.20</b> | 0.63 | 2.27 | <b>1.23</b> | 0.61 | 2.45 | <b>0.62</b> | 0.31 | 1.25 | <b>1.56</b>    | 0.79 | 3.07 | <b>0.94</b> | 0.52 | 1.68 | <b>1.09</b> | 0.42 | 2.84 |
| Smoker              | <b>0.60</b> | 0.42 | 0.86 | <b>0.62</b> | 0.42 | 0.92 | <b>0.79</b> | 0.52 | 1.21 | <b>0.68</b> | 0.47 | 0.99 | <b>1.30</b>    | 0.89 | 1.90 | <b>1.09</b> | 0.76 | 1.59 | <b>1.01</b> | 0.57 | 1.80 |
| BMI <25.0           | <b>0.88</b> | 0.55 | 1.42 | <b>0.95</b> | 0.59 | 1.53 | <b>1.03</b> | 0.61 | 1.74 | <b>0.71</b> | 0.42 | 1.20 | <b>1.23</b>    | 0.72 | 2.11 | <b>0.90</b> | 0.57 | 1.43 | <b>0.67</b> | 0.37 | 1.22 |
| BMI >25.0           | <b>0.63</b> | 0.42 | 0.94 | <b>0.58</b> | 0.36 | 0.93 | <b>0.79</b> | 0.49 | 1.29 | <b>0.64</b> | 0.42 | 0.97 | <b>1.42</b>    | 0.93 | 2.17 | <b>1.18</b> | 0.77 | 1.81 | <b>2.01</b> | 0.80 | 5.03 |
| Sedentary           | <b>0.60</b> | 0.41 | 0.89 | <b>0.80</b> | 0.53 | 1.22 | <b>0.98</b> | 0.63 | 1.54 | <b>0.71</b> | 0.47 | 1.08 | <b>1.16</b>    | 0.76 | 1.77 | <b>0.83</b> | 0.55 | 1.25 | <b>1.09</b> | 0.59 | 2.02 |
| Active at work      | <b>0.98</b> | 0.60 | 1.59 | <b>0.67</b> | 0.39 | 1.16 | <b>0.76</b> | 0.42 | 1.39 | <b>0.62</b> | 0.36 | 1.06 | <b>1.72</b>    | 1.00 | 2.95 | <b>1.47</b> | 0.90 | 2.42 | <b>0.91</b> | 0.40 | 2.07 |
| Not working         | <b>0.63</b> | 0.32 | 1.22 | <b>0.91</b> | 0.44 | 1.88 | <b>1.39</b> | 0.64 | 3.05 | <b>0.51</b> | 0.25 | 1.03 | <b>1.15</b>    | 0.54 | 2.44 | <b>0.69</b> | 0.36 | 1.34 | <b>0.76</b> | 0.29 | 2.01 |
| Working             | <b>0.74</b> | 0.53 | 1.04 | <b>0.70</b> | 0.48 | 1.02 | <b>0.78</b> | 0.52 | 1.18 | <b>0.71</b> | 0.49 | 1.03 | <b>1.42</b>    | 0.98 | 2.05 | <b>1.17</b> | 0.82 | 1.66 | <b>1.13</b> | 0.64 | 1.99 |

4th quartile

|                |             |      |      |             |      |      |             |      |      |             |      |      |             |      |      |             |      |      |             |      |      |
|----------------|-------------|------|------|-------------|------|------|-------------|------|------|-------------|------|------|-------------|------|------|-------------|------|------|-------------|------|------|
| 50-59 years    | <b>0.79</b> | 0.53 | 1.17 | <b>0.69</b> | 0.46 | 1.05 | <b>0.99</b> | 0.63 | 1.54 | <b>0.90</b> | 0.62 | 1.31 | <b>0.90</b> | 0.58 | 1.38 | <b>0.78</b> | 0.50 | 1.23 | <b>1.10</b> | 0.56 | 2.16 |
| 60-64 years    | <b>0.69</b> | 0.46 | 1.05 | <b>0.61</b> | 0.35 | 1.04 | <b>1.51</b> | 0.87 | 2.60 | <b>0.65</b> | 0.38 | 1.12 | <b>0.96</b> | 0.53 | 1.74 | <b>0.97</b> | 0.57 | 1.66 | <b>0.89</b> | 0.39 | 2.03 |
| Non smoker     | <b>0.79</b> | 0.40 | 1.56 | <b>0.64</b> | 0.31 | 1.32 | <b>1.53</b> | 0.76 | 3.04 | <b>1.22</b> | 0.66 | 2.24 | <b>0.67</b> | 0.30 | 1.52 | <b>0.74</b> | 0.39 | 1.41 | <b>1.29</b> | 0.47 | 3.53 |
| Smoker         | <b>0.70</b> | 0.50 | 0.99 | <b>0.66</b> | 0.46 | 0.95 | <b>1.05</b> | 0.71 | 1.57 | <b>0.77</b> | 0.53 | 1.10 | <b>0.97</b> | 0.66 | 1.43 | <b>0.91</b> | 0.61 | 1.37 | <b>0.93</b> | 0.51 | 1.71 |
| BMI <25.0      | <b>0.83</b> | 0.50 | 1.36 | <b>0.74</b> | 0.45 | 1.21 | <b>1.10</b> | 0.65 | 1.86 | <b>1.07</b> | 0.66 | 1.74 | <b>1.05</b> | 0.61 | 1.80 | <b>0.69</b> | 0.42 | 1.13 | <b>0.61</b> | 0.32 | 1.18 |
| BMI >25.0      | <b>0.68</b> | 0.46 | 1.00 | <b>0.60</b> | 0.39 | 0.93 | <b>1.24</b> | 0.79 | 1.94 | <b>0.73</b> | 0.49 | 1.10 | <b>0.83</b> | 0.52 | 1.30 | <b>1.01</b> | 0.63 | 1.62 | <b>2.12</b> | 0.82 | 5.47 |
| Sedentary      | <b>0.81</b> | 0.56 | 1.18 | <b>0.75</b> | 0.50 | 1.14 | <b>1.10</b> | 0.71 | 1.70 | <b>1.04</b> | 0.71 | 1.53 | <b>0.84</b> | 0.54 | 1.30 | <b>0.81</b> | 0.52 | 1.26 | <b>1.08</b> | 0.56 | 2.07 |
| Active at work | <b>0.62</b> | 0.36 | 1.07 | <b>0.55</b> | 0.32 | 0.94 | <b>1.33</b> | 0.77 | 2.29 | <b>0.65</b> | 0.38 | 1.10 | <b>1.10</b> | 0.62 | 1.95 | <b>0.96</b> | 0.55 | 1.67 | <b>0.88</b> | 0.37 | 2.10 |
| Not working    | <b>0.84</b> | 0.47 | 1.50 | <b>0.86</b> | 0.44 | 1.67 | <b>1.59</b> | 0.75 | 3.33 | <b>0.68</b> | 0.37 | 1.23 | <b>0.60</b> | 0.28 | 1.33 | <b>0.92</b> | 0.48 | 1.78 | <b>0.98</b> | 0.36 | 2.69 |
| Working        | <b>0.65</b> | 0.45 | 0.95 | <b>0.58</b> | 0.39 | 0.86 | <b>1.08</b> | 0.73 | 1.62 | <b>0.90</b> | 0.63 | 1.29 | <b>1.01</b> | 0.69 | 1.50 | <b>0.80</b> | 0.53 | 1.19 | <b>1.00</b> | 0.55 | 1.85 |

Total number of persons in each stratum: 50-59 years = 40 085, n cases = 374 | 60-64 years = 14 560, n cases = 155 | Non smoker = 19 269, n cases = 134 | Smoker = 35 376, n cases = 395 | BMI <25 = 23 648, n cases = 232 | BMI >25 = 30 997, n cases = 297 | Sedentary work = 31 697, n cases = 345 | Active at work = 22 948, n cases = 184 | Not working = 12 041, n cases = 146 | Working = 42 604, n cases = 383
